# Supplementary material for: Potential Applications of Essential Oils for Environmental Sanitization and Antimicrobial Treatment of Intensive Livestock Infections
Source: MDPI journal article supplement (doi:10.3390/microorganisms10040822), 2022-04-15
Supplement: s1 [file s1]

## Supporting Information

# Potential applications of essential oils for environmental sanitization and antimicrobial treatment of intensive livestock infections

Melinda Mariotti <sup>1\*</sup>, Giulia Lombardini <sup>1</sup>, Silvia Rizzo <sup>1</sup>, Donatella Scarafile <sup>2</sup>, Monica Modesto <sup>2</sup>, Eleonora Truzzi <sup>3</sup>, Stefania Benvenuti <sup>3</sup>, Alberto Elmi <sup>4</sup>, Martina Bertocchi <sup>4</sup>, Laura Fiorentini <sup>5</sup>, Lorenzo Gambi <sup>5</sup>, Maurizio Scozzoli <sup>6</sup>, Paola Mattarelli <sup>2</sup>.

- <sup>1</sup> Dipartimento di Scienze Biotechnologiche di Base, Cliniche Intensivologiche e Perioperatorie, Università Cattolica del Sacro Cuore, Largo A. Gemelli 8, 00168 Rome, Italy; melinda.mariotti@unicatt.it (M.M.); giulia.lombardini@unicatt.it (G.L.); silvia.rizzo01@icatt.it (S.R.)
- <sup>2</sup> Dipartimento di Scienze e Tecnologie Agro-Alimentari, Università di Bologna, Viale G. Fanin 42, 40127 Bologna, Italy; donatella.scarafile2@unibo.it (D.S.); monica.modesto@unibo.it (Mo.M.); paola.mattarelli@unibo.it (P.M.)
- <sup>3</sup> Dipartimento di Scienze della Vita, Università di Modena e Reggio Emilia, Via G. Campi 103, 41125 Modena, Italy; eleonora.truzzi@unimore.it ([E.T.](mailto:eleonora.truzzi@unimore.it)); stefania.benvenuti@unimore.it ([S.B.](mailto:stefania.benvenuti@unimore.it))
- <sup>4</sup> Dipartimento di Scienze Mediche Veterinarie, Università di Bologna, Via Tolara di Sopra 50, Ozzano dell'Emilia, 40064 Bologna, Italy; alberto.elmi2@unibo.it (A.E.); martina.bertocchi3@unibo.it (M.B.)
- <sup>5</sup> Istituto Zooprofilattico Sperimentale della Lombardia e dell'Emilia Romagna (IZSLER) – Sede Territoriale di Forlì, Via Don Eugenio Servadei 3E/3F, 47122 Forlì, Italy; laura.fiorentini@izsler.it ([L.F.](mailto:laura.fiorentini@izsler.it)); lorenzo.gambi@izsler.it ([L.G.](mailto:lorenzo.gambi@izsler.it))
- <sup>6</sup> Società Italiana per la Ricerca sugli Oli Essenziali (SIROE), Viale Regina Elena 299, 00161 Rome, Italy; mscozzoli@gmail.com (M.S.)

\* Correspondence: melinda.mariotti@unicatt.it; Tel.: +39-063-015-4218; Fax: +39-063-051-152

## List of contents

Table S1

Table S2

**Table S1.** Complete chemical composition of essential oils. The results are expressed as relative percentage of abundance of each mono- and sesquiterpene.

| Components             | LRI <sup>1</sup> | <i>L. x intermedia</i> | <i>L. angustifolia</i> | <i>M. alternifolia</i> | <i>E. globus</i> | <i>M. leucadendron</i> | <i>O. vulgare</i> | <i>C. zeylanicum</i> | <i>C. limon</i> | <i>M. piperita</i> | GR-OLI |
|------------------------|------------------|------------------------|------------------------|------------------------|------------------|------------------------|-------------------|----------------------|-----------------|--------------------|--------|
| $\alpha$ -thujene      | 927              | 0.08                   | 0.13                   | 0.03                   | -                | -                      | 0.82              | -                    | 0.36            | -                  | 0.17   |
| $\alpha$ -pinene       | 933              | 0.40                   | 0.20                   | 4.71                   | 2.91             | 3.61                   | 0.98              | 0.09                 | 2.09            | 0.90               | 0.92   |
| camphene               | 947              | 0.28                   | 0.05                   | -                      | 0.02             | 0.03                   | 0.13              | 0.03                 | 0.07            | 0.12               | 0.10   |
| benzaldehyde           | 958              | -                      | -                      | -                      | -                | -                      | -                 | 0.16                 | -               | -                  | -      |
| sabinene               | 973              | 0.12                   | 0.05                   | 0.03                   | -                | 0.06                   | -                 | -                    | -               | 0.37               | 0.09   |
| $\beta$ -pinene        | 976              | 0.39                   | 0.11                   | 0.03                   | 0.50             | 0.36                   | 0.15              | 0.02                 | 14.82           | 1.42               | 1.17   |
| octen-3-ol             | 980              | 0.23                   | 0.34                   | -                      | -                | -                      | 0.46              | -                    | -               | -                  | -      |
| 3-octanone             | 987              | -                      | 0.60                   | -                      | -                | -                      | 0.22              | -                    | -               | -                  | -      |
| myrcene                | 992              | 0.93                   | 1.06                   | 0.71                   | 0.68             | 0.39                   | 1.51              | -                    | 1.53            | 0.16               | 0.58   |
| 3-octanol              | 997              | -                      | -                      | -                      | -                | -                      | 0.05              | -                    | -               | 0.11               | -      |
| $\alpha$ -phellandrene | 1005             | 0.04                   | 0.07                   | 0.18                   | 0.86             | 0.22                   | 0.18              | -                    | 0.08            | -                  | 0.09   |
| $\delta$ -3-carene     | 1010             | 0.07                   | -                      | -                      | -                | -                      | -                 | -                    | -               | -                  | -      |
| $\alpha$ -terpinene    | 1015             | 0.14                   | -                      | 9.73                   | 0.18             | 0.24                   | 1.06              | -                    | 0.25            | -                  | 0.81   |
| o-cymene               | 1022             | -                      | -                      | 0.68                   | -                | -                      | -                 | -                    | -               | -                  | -      |
| p-cymene               | 1024             | 0.65                   | 0.17                   | 3.97                   | -                | 1.28                   | 7.04              | 1.64                 | 0.18            | 0.18               | 4.52   |
| limonene               | 1029             | -                      | 0.82                   | 1.85                   | -                | -                      | 0.47              | 0.26                 | 67.8            | 2.57               | 8.89   |
| 1,8 cineole            | 1032             | 4.74                   | 0.65                   | 2.20                   | 91.44            | 77.30                  | -                 | 0.22                 | -               | 6.47               | 6.95   |
| cis-ocimene            | 1039             | 0.83                   | 8.51                   | -                      | -                | -                      | -                 | -                    | -               | -                  | 0.38   |
| trans-ocimene          | 1049             | 0.50                   | 1.22                   | -                      | 0.03             | -                      | 0.05              | -                    | 0.13            | -                  | 0.23   |
| $\gamma$ -terpinene    | 1059             | 0.11                   | 0.17                   | 20.64                  | 2.06             | 0.96                   | 5.50              | -                    | 8.61            | 0.05               | 4.10   |
| trans sabinene hydrate | 1067             | 0.11                   | -                      | -                      | -                | -                      | 0.18              | -                    | -               | 0.05               | -      |
| cis linalool oxide     | 1073             | 0.2                    | 0.09                   | 0.26                   | -                | -                      | -                 | -                    | -               | 0.03               | -      |
| trans linalool oxide   | 1089             | 0.34                   | 0.21                   | 0.02                   | -                | 0.15                   | -                 | 0.12                 | -               | 0.04               | -      |
| terpinolene            | 1090             | -                      | -                      | 3.14                   | -                | -                      | 0.15              | -                    | 0.35            | -                  | 0.39   |
| linalool               | 1109             | 35.16                  | 39.69                  | 0.39                   | -                | 1.94                   | 1.48              | 4.27                 | 0.08            | 0.13               | 3.23   |
| $\alpha$ -fenchol      | 1116             | 0.26                   | 1.13                   | -                      | -                | -                      | -                 | 0.12                 | -               | -                  | -      |
| trans-pinocarveol      | 1139             | -                      | -                      | 0.52                   | -                | -                      | -                 | -                    | -               | 0.04               | -      |
| camphor                | 1147             | 6.82                   | 0.20                   | -                      | -                | -                      | -                 | -                    | -               | -                  | -      |
| isopulegol             | 1148             | -                      | -                      | -                      | -                | -                      | -                 | -                    | -               | 0.12               | -      |
| menthone               | 1160             | -                      | -                      | -                      | -                | -                      | -                 | -                    | 0.03            | 28.07              | -      |

|                           |      |       |       |       |      |      |       |       |      |       |       |
|---------------------------|------|-------|-------|-------|------|------|-------|-------|------|-------|-------|
| borneol                   | 1169 | 3.03  | 0.86  | -     | -    | 0.45 | 0.19  | -     | -    | -     | 0.41  |
| isomenthone               | 1169 | -     | -     | -     | -    | -    | -     | -     | -    | 9.56  | -     |
| lavandulol                | 1171 | 0.87  | 0.76  | -     | -    | -    | -     | -     | -    | -     | -     |
| terpinen-4-ol             | 1181 | 3.48  | 3.95  | 40.77 | 0.05 | 2.93 | 0.53  | 0.26  | 0.08 | -     | 3.98  |
| menthol                   | 1183 | -     | -     | -     | -    | -    | -     | -     | -    | 36.00 | -     |
| p-cymen-8-ol              | 1185 | -     | 0.09  | -     | -    | 5.56 | -     | -     | -    | -     | -     |
| $\alpha$ -terpineol       | 1193 | 0.87  | 1.5   | 4.40  | -    | -    | -     | 0.31  | 0.14 | 0.44  | 2.07  |
| myrtenal                  | 1195 | 0.39  | -     | 1.37  | -    | -    | -     | -     | -    | -     | -     |
| nerol                     | 1221 | -     | -     | -     | -    | -    | -     | -     | -    | -     | -     |
| carveol                   | 1232 | 0.03  | -     | -     | -    | -    | -     | -     | -    | -     | -     |
| citronellol               | 1233 | -     | -     | -     | -    | -    | -     | 0.27  | 0.04 | -     | -     |
| pulegone                  | 1244 | -     | -     | -     | -    | -    | -     | -     | 0.80 | 0.90  | -     |
| carvone                   | 1249 | -     | -     | -     | -    | -    | -     | -     | -    | 0.07  | -     |
| piperitone                | 1259 | -     | -     | -     | -    | -    | -     | -     | -    | 0.65  | -     |
| geraniol                  | 1261 | -     | -     | -     | -    | -    | -     | 0.28  | -    | -     | 2.28  |
| linalyl acetate           | 1268 | 27.97 | 26.39 | -     | -    | -    | -     | -     | -    | -     | -     |
| geranial                  | 1275 | -     | -     | -     | -    | -    | -     | -     | 1.19 | -     | 0.17  |
| trans-cinnamaldehyde      | 1277 | -     | -     | -     | -    | -    | -     | -     | -    | -     | 14.96 |
| eugenol                   | 1287 | -     | -     | -     | -    | -    | -     | 70.43 | -    | -     | -     |
| lavandulyl acetate        | 1295 | 2.22  | 2.43  | -     | -    | -    | -     | -     | -    | -     | -     |
| thymol                    | 1296 | -     | -     | -     | -    | -    | 2.78  | -     | -    | -     | 3.47  |
| menthyl acetate           | 1298 | -     | -     | -     | -    | -    | -     | -     | -    | 4.8   | -     |
| geranyl formate           | 1305 | -     | -     | -     | -    | 0.10 | -     | -     | -    | 0.05  | -     |
| carvacrol                 | 1308 | -     | -     | -     | -    | -    | 66.98 | 0.49  | -    | -     | 35.61 |
| $\delta$ -elemene         | 1341 | -     | -     | -     | -    | -    | -     | -     | -    | 0.10  | -     |
| $\alpha$ -terpinylacetate | 1354 | -     | -     | -     | -    | -    | -     | -     | -    | 0.05  | -     |
| citronellyl acetate       | 1358 | -     | -     | -     | -    | -    | -     | -     | -    | -     | 1.14  |
| neryl acetate             | 1369 | 0.28  | 0.52  | -     | -    | -    | -     | 5.84  | 0.27 | -     | -     |
| $\alpha$ -copaene         | 1380 | -     | -     | -     | -    | -    | -     | -     | -    | 0.09  | -     |
| geranyl acetate           | 1387 | 0.54  | 0.99  | -     | -    | -    | -     | -     | 0.14 | -     | -     |
| $\beta$ -bourbonene       | 1389 | -     | -     | -     | -    | -    | -     | -     | -    | 0.18  | -     |
| $\alpha$ -gurjunene       | 1415 | 0.03  | -     | -     | -    | -    | -     | -     | -    | -     | -     |
| $\beta$ -caryophyllene    | 1426 | 1.72  | 2.10  | 0.03  | -    | 0.47 | 1.64  | 4.83  | 0.14 | 2.95  | 2.33  |

|                        |      |       |       |       |       |       |       |       |       |       |       |      |
|------------------------|------|-------|-------|-------|-------|-------|-------|-------|-------|-------|-------|------|
| $\alpha$ -bergamotene  | 1441 | 0.19  | -     | -     | -     | -     | -     | -     | -     | -     | -     | -    |
| aromadendrene          | 1446 | -     | -     | 1.20  | -     | -     | -     | -     | -     | -     | -     | -    |
| trans-cinnamyl acetate | 1449 | -     | -     | -     | -     | -     | -     | -     | -     | -     | -     | 0.19 |
| $\alpha$ -humulene     | 1460 | -     | -     | -     | -     | -     | -     | 0.11  | 0.03  | 0.32  | -     | -    |
| $\beta$ -farnesene     | 1462 | 1.24  | 1.36  | -     | -     | -     | -     | -     | -     | -     | -     | 0.33 |
| allo-aromadendrene     | 1468 | -     | -     | 0.15  | -     | -     | -     | -     | -     | -     | -     | -    |
| germacrene D           | 1488 | 0.55  | -     | -     | -     | -     | -     | -     | -     | 0.08  | -     | -    |
| $\alpha$ -selinene     | 1500 | -     | -     | -     | -     | -     | -     | -     | 0.03  | -     | -     | -    |
| viridiflorene          | 1501 | -     | -     | -     | -     | -     | -     | -     | -     | 0.14  | -     | -    |
| $\alpha$ -muurolene    | 1504 | -     | -     | -     | -     | -     | -     | -     | 0.03  | -     | -     | -    |
| $\gamma$ -cadinene     | 1522 | 0.22  | 0.05  | -     | -     | -     | -     | -     | -     | -     | -     | -    |
| $\delta$ -cadinene     | 1530 | 0.16  | -     | 0.02  | -     | -     | -     | -     | -     | 0.04  | -     | -    |
| eugenyl acetate        | 1535 | -     | -     | -     | -     | -     | -     | 0.89  | -     | -     | -     | -    |
| caryophyllene oxide    | 1593 | 0.12  | 0.29  | 0.62  | -     | -     | 0.14  | 0.21  | -     | 0.28  | 0.10  | -    |
| viridiflorolo          | 1602 | -     | -     | -     | -     | -     | -     | -     | -     | -     | -     | -    |
| total                  |      | 96.31 | 96.76 | 97.82 | 98.73 | 96.05 | 92.69 | 91.03 | 99.27 | 97.53 | 99.47 |      |

Note: LRI<sup>1</sup>: Linear Retention Index.

**Table S2.** Micro-atmosphere diffusion assay. Table shows mean values and standard deviations of replicates.

| <i>cm</i>      |                      |                   |             |                 |         |
|----------------|----------------------|-------------------|-------------|-----------------|---------|
| D <sup>1</sup> | <i>C. zeylanicum</i> | <i>O. vulgare</i> | GR-OLI Mix  | <i>C. limon</i> | Control |
| ST1            | 3.93 ± 0.096         | 2.73 ± 0.15       | 2.18 ± 0.28 | 0 ± 0           | 0 ± 0   |
| ST2            | 3 ± 0.52             | 1.98 ± 0.39       | 1.3 ± 0.24  | 0 ± 0           | 0 ± 0   |
| ST3            | 3.25 ± 0.19          | 2.53 ± 0.05       | 1.1 ± 0.08  | 0 ± 0           | 0 ± 0   |
| Ec7            | 2.68 ± 0.05          | 3 ± 0.48          | 1.43 ± 0.10 | 0 ± 0           | 0 ± 0   |
| Ec8            | 2.98 ± 0.05          | 3.55 ± 0.37       | 2.08 ± 0.15 | 0 ± 0           | 0 ± 0   |
| Ec9            | 2.9 ± 0.18           | 2.65 ± 0.06       | 1.6 ± 0.12  | 0 ± 0           | 0 ± 0   |
| Ec10           | 2.83 ± 0.17          | 3.33 ± 0.38       | 1.55 ± 0.19 | 0 ± 0           | 0 ± 0   |

Note: D<sup>1</sup>: Designation.
